# Supplementary material for: Equilibrium unconstrained low-temperature CO2 conversion on doped gallium oxides by chemical looping
Source: Royal Society of Chemistry journal article supplement (doi:10.1039/d3cc02399k), 2023-01-01
Supplement: d3cc02399k1.pdf [file d3cc02399k1.pdf]

Electronic supplementary information

**Equilibrium unconstrained low-temperature CO<sub>2</sub> conversion on doped gallium oxides by chemical looping**

Keke Kang<sup>a</sup>, Sota Kakihara<sup>a</sup>, Takuma Higo<sup>a</sup>, Hiroshi Sampei<sup>a</sup>, Koki Saegusa<sup>a</sup>, Yasushi Sekine<sup>\*a</sup>

\*Correspondence to: Yasushi SEKINE: [ysekine@waseda.jp](mailto:ysekine@waseda.jp)

**This file includes:**

Supplementary text

Figures S1 to S20

Tables S1 to S4

## **Supplementary text**

### **Material and method**

#### **Material preparation**

$\text{Ga}_2\text{O}_3$ ,  $\text{NiGa}_2\text{O}_4$ ,  $\text{CuGa}_2\text{O}_4$ ,  $\text{CoGa}_2\text{O}_4$  used in this study were prepared by a complex polymerization method. Firstly, the stoichiometric precursors (Kanto Chemical Co. Inc.) of  $\text{Cu}(\text{NO}_3)_2 \cdot 3\text{H}_2\text{O}$  (when used),  $\text{Co}(\text{NO}_3)_2 \cdot 6\text{H}_2\text{O}$  (when used),  $\text{Ni}(\text{NO}_3)_2 \cdot 6\text{H}_2\text{O}$  (when used) and  $\text{Ga}(\text{NO}_3)_3 \cdot n\text{H}_2\text{O}$  were dissolved in pure water, then excess citric acid and ethylene glycol (Kanto Chemical Co. Inc.) with molar ratio of metal ion: citric acid: ethylene glycol = 1:3:3 were put into the solutions. Afterward, the solutions were stirred in a water bath at 353 K for 18 h, and then dried with stirring at 573 K. After that, the obtained solid mixtures were moved into muffle furnace, pre-calcined at 673 K for 2 h and calcined at 1123 K for 10 h. Finally, the target materials were successfully prepared.

#### **Evaluation of maximum $\text{CO}_2$ conversion**

The maximum  $\text{CO}_2$  conversion of the oxidation step (equation 5) was measured on a thermogravimetric analyzer (TG-50A; Shimadzu Corp.). The oxide material was firstly pre-reduced by 40%  $\text{H}_2$  (Ar balance), and then oxidized by  $\text{CO}-\text{CO}_2$  mixed gas (Ar balance) with certain  $\text{CO}/\text{CO}_2$  ratio. If signal for weight increase of the material was captured, it would be deemed that the oxidation reaction (equation 5) could forward proceed (from left to right) with that  $\text{CO}/\text{CO}_2$  ratio. In this situation,  $\text{CO}-\text{CO}_2$  mixed gas with higher  $\text{CO}/\text{CO}_2$  ratio would be introduced, and then the above operations would be repeated until weight decrease of the material observed. The  $\text{CO}/\text{CO}_2$  ratio just before weight starting to decrease was defined as the maximum  $\text{CO}_2$  conversion of the oxide material.

#### **RWGS-CL cycle test**

RWGS-CL cycle test was performed on a thermogravimetric apparatus (TG-50A; Shimadzu Corp.) using 30 mg of the as prepared oxide material. After rising to pre-set temperatures in Ar atmosphere,  $\text{NiGa}_2\text{O}_4$  and  $\text{CuGa}_2\text{O}_4$  were sufficiently pre-reduced by 40%  $\text{H}_2$  (Ar balance) at 973 K until all the oxides can participate in the redox cycles and the following cycles reaching stable. However, although  $\text{CoGa}_2\text{O}_4$  were pre-

reduced at 1073 K (the low reduction rate is relatively low at 973 K) with more than two oxygen atoms were reduced, not all the oxides can participate in the redox cycles. It is shown in Fig. S5 that the reduction amounts of  $\text{CoGa}_2\text{O}_x$  increase cycle by cycle, and the XRD peaks for unreacted  $\text{CoGa}_2\text{O}_4$  are always remained after reduction and even after 5 cycles oxidation in Fig. S6. These confirm that  $\text{CoGa}_2\text{O}_x$  didn't reach stable after pre-reduction. Deeper pre-reduction at high temperature will aggregate the particles and shrink the surface area, thereby further decrease the oxidation rate. Therefore, we suppose  $\text{CoGa}_2\text{O}_x$  is not so proper material for RWGS-CL and keep the pre-reduction condition here.

After the pre-reduction, the temperature was respectively changed to 873 K, 923 K, 973 K, 1023 K and 1073 K in Ar atmosphere for the following isothermal cycles. And then the oxides were re-oxidized under different oxidation conditions (10%  $\text{CO}_2$ ; 90%  $\text{CO}$ -10%  $\text{CO}_2$ ). Both oxidation step with  $\text{CO}_2$  and with  $\text{CO}+\text{CO}_2$  were stopped until no fast increase of the sample weight could be observed, which is determined by the differential of the weight change. Then the oxidized materials were reduced by 40%  $\text{H}_2$  (Ar balance) for 30 min, and this is defined as reduction step. And a set of reduction and oxidation step was defined as one cycle of isothermal RWGS-CL. The total flow rate was set constant to  $100 \text{ mL min}^{-1}$ . As calculated according to following equation S1, the amounts of reduction and oxidation (redox) were defined as the amounts of oxygen atoms released or restored in each step.

$$\text{Reduction or Oxidation (Redox) amount [mmol g}^{-1}\text{]} = \frac{|\Delta m|}{m_{\text{sample}} \times M_{\text{O}}} \quad (\text{S1})$$

In this equation,  $\Delta m / \text{mg}$ ,  $m_{\text{sample}} / \text{g}$  and  $M_{\text{O}} / \text{g mol}^{-1}$  respectively represent the change of sample weight during each step, the initial sample weight, and molar mass of oxygen atom. The average  $\text{CO}_2$  splitting rate was defined as shown in equation S2.

$$\text{Average CO}_2 \text{ splitting rate [mmol g}^{-1} \text{ min}^{-1}\text{]} = \frac{\text{Amount of oxidation}}{\Delta t} \quad (\text{S2})$$

Therein,  $\Delta t / \text{min}$  represents the time necessary to complete  $\text{CO}_2$  oxidation.

### $\text{H}_2$ -TPR and $\text{CO}_2$ -TPO

$\text{H}_2$  temperature-programmed reduction ( $\text{H}_2$ -TPR) and  $\text{CO}_2$  temperature-

programmed oxidation (CO<sub>2</sub>-TPO) were conducted on TG-50A (Shimadzu Corp.) aiming to investigate the redox properties of the oxides. For H<sub>2</sub>-TPR, after H<sub>2</sub> pretreatment and re-oxidation with CO+CO<sub>2</sub> at 973 K, the materials were cooled down to 573 K in Ar atmosphere and then risen to 1073 K with heating rate of 4 K min<sup>-1</sup> in 10% H<sub>2</sub> flow. The reacted H<sub>2</sub> amount is detected by the mass loss of the oxide materials.

Thereafter, CO<sub>2</sub>-TPO was conducted with the reduced oxygen carriers resulted from the H<sub>2</sub>-TPR. After the materials were cooled down to 573 K in Ar atmosphere after H<sub>2</sub>-TPR, they were oxidized by 10% CO<sub>2</sub> with a heating rate of 4 K min<sup>-1</sup> from 573 K to 1073 K. The reacted CO<sub>2</sub> amount is detected by the gained mass of the oxide materials. Consumed H<sub>2</sub> and CO<sub>2</sub> amounts during the H<sub>2</sub>-TPR and CO<sub>2</sub>-TPO experiment were calculated by the following equation:

$$\text{H}_2 \text{ or CO}_2 \text{ consumption rate [mmol g}^{-1} \text{ min}^{-1}] = \frac{\text{Amount of reduction/oxidation}}{\Delta t} \quad (\text{S3})$$

#### Structural characterizations (XRD, TEM-EDX, BET and *in situ* XAFS)

To investigate the crystal structure of the prepared materials, powder X-ray diffraction (XRD) measurements were conducted using an X-ray diffractometer (Smart Lab-III; Rigaku Corp.) with Cu-K $\alpha$  radiation at 40 kV and 40 mA.

The morphology and element distribution of NiGa<sub>2</sub>O<sub>4</sub> were investigated by a scanning transmission electron microscope with an energy-dispersive X-ray spectrometer (STEM-EDX; JEOL JEM 2100F).

The specific surface area was calculated from nitrogen adsorption isotherm at 77 K by the Brunauer–Emmett–Teller (BET) method (Gemini VII 2390a; Micromeritics Instrument).

*In situ* X-ray adsorption fine structure (*in situ* XAFS) measurement for Ga and Ni K-edge was conducted at the beamline BL14B2 of SPring-8 using transmission mode. Quantificational NiGa<sub>2</sub>O<sub>4</sub> powder and boron nitride (BN) were mixed and crushed together evenly, and pressed into a 10 mm pellet to put in *in situ* cell. The size of the beam that can transmit the sample pellet is 1 (vertical) mm  $\times$  5.0 (horizontal) mm. First, the sample pellet was ramped up to 973 K in N<sub>2</sub> flow and then pre-reduced by 40% H<sub>2</sub>

for 90 min at 973 K. After pre-reduction treatment, the oxidation by 10% CO<sub>2</sub> of the sample pellet was conducted for 30 min at 973 K. Then another reduction by 40% H<sub>2</sub> for 30 min, which is followed by the oxidation of the mixing gas of 80% CO and 20% CO<sub>2</sub>. The XAFS spectra were captured regularly during all the reduction and oxidation steps. Gas lines were cleaned by purging N<sub>2</sub> for 10 min before changing to another gas. N<sub>2</sub> was used as balance gas and the total flow rate is kept as 100 mL min<sup>-1</sup> during the whole process.

### Computational details

Density functional theory (DFT) calculations were performed by the Vienna Ab initio Simulation Package (VASP) 6.3.1 [Kresse 1993] [Kresse 1996], which can represent the core-valence electrons by using a projector augmented wave (PAW) method [Blochl 1994] [Kresse 1999]. Electron exchange and correlation were described by the generalized gradient approximation (GGA) of Perdew-Burke-Ernzerhof (PBE) [Perdew 1996]. And we employed a plane-wave cutoff energy as 400 eV. Also, the total energy convergence of structure optimization was set to 10<sup>-5</sup> eV. All calculations were considered the spin polarization and van der Waals interactions by using DFT-D3 proposed by Grimme [Grimme 2010].

X-ray absorption near edge structure (XANES) was simulated by using CASTEP code [Clark 2005] integrated in the Materials Studio software package. CASTEP calculations were also employed the GGA-PBE as an exchange -correlation function. Cutoff energy was set to 400 eV and self-consistent field (SCF) convergence tolerance was set to 10<sup>-6</sup> eV/atom. Also, (2×2×2) Monkhorst-Pack *k*-point mesh was used for SCF calculations and XANES simulations. This simulation was also considered the van der Waals interaction using DFT-D3 as well. The calculated XANES spectra were smoothed and shifted because of high energy resolution and low accuracy of absolute energy on DFT calculations. The smoothing and shift parameters were decided by adjusting calculated spectrum of Ni metal to measured spectrum of that between -10 to 20 eV of absorption edge.

## References:

- [Kresse 1993] G. Kresse and J. Hafner, *Phys. Rev. B*, **47** (1993) 558–561.  
[Kresse 1996] G. Kresse and J. Furthmüller, *Phys. Rev. B*, **54** (1996) 11169–11186.  
[Blochl 1994] P.E. Blöchl, *Phys. Rev. B*, **50** (1994) 17953–17979.  
[Kresse 1999] G. Kresse and D. Joubert, *Phys. Rev. B*, **59** (1999) 1758–1775.  
[Perdew 1996] J. P. Perdew, K. Burke and M. Ernzerhof, *Phys. Rev. Lett.*, **77** (1996) 3865–3868.  
[Grimme 2010] S. Grimme, J. Antony, S. Ehrlich and S. Krieg, *J. Chem. Phys.*, **132** (2010) 154104.  
[Clark 2005] S. J. Clark, M. D. Segall, C. J. Pickard, P. J. Hasnip, M. I. J. Probert, K. Refson and M. C. Payne, *Z. Kristallogr.*, **220** (2005) 567–570.

## Ozawa–Flynn–Wall kinetics analysis

Ozawa–Flynn–Wall (OFW) kinetics analysis is a model-free (isoconversional) method, whose kinetics parameters can be obtained through thermogravimetric curves [Flynn 1966] [Ozawa 1965]. The activation energy ( $E_a$ ) can be obtained from the conversion ( $\alpha$ ) of oxides and different constant heating rates ( $\beta$ ).

The conversion ( $\alpha$ ) of the oxides was defined as the following equation S4, where  $m_i$  is the initial weight (the weight of oxides before reaction),  $m_t$  is the weight at the time  $t$  and  $m_f$  is the final weight (the weight of oxides when completing the reaction).

$$\alpha = \frac{m_t - m_i}{m_f - m_i} \quad (\text{S4})$$

If the investigated sample with the same  $\alpha$ , the dependence of  $\beta$  and  $E_a$  can be obtained by the OFW equation S5, showing as a straight line. That is to say,  $E_a$  can be calculated from the slop of the straight line from  $\log \beta$  versus  $1/T$ .

$$\log \beta + 0.4567 \frac{E_a}{RT} = \text{constant} \quad (\text{S5})$$

In this work, thermogravimetric apparatus (TG-50A; Shimadzu Corp.) was used to obtain the kinetics parameters. To figure out why  $\text{NiGa}_2\text{O}_x$  can show high  $\text{CO}_2$  splitting rate even under 90% concentration of  $\text{CO}$ ,  $\text{CuGa}_2\text{O}_x$  was investigated as a reference. The experiments were conducted by separately oxidize the samples with 10%  $\text{CO}_2$  and reduce them with 90%  $\text{CO}$ . For the  $\text{CO}_2$  oxidation, after the pre-reduction treatment by 40%  $\text{H}_2$  at 973 K and cooling down to room temperature, samples were oxidized by 10%  $\text{CO}_2$  with the temperature heating up to 1123 K, and the heating rate ( $\beta$ ) for  $\text{NiGa}_2\text{O}_x$  is 5, 10, 15, 20  $\text{K min}^{-1}$  and for  $\text{CuGa}_2\text{O}_x$  is 5, 10, 20  $\text{K min}^{-1}$ . Similarly,

for the CO reduction, after the pre-reduction treatment by 40% H<sub>2</sub>, re-oxidation by 10% CO<sub>2</sub> at 973 K, and cooling down to room temperature, the oxidized samples were reduced by 90% CO with the temperature heating up to 1123 K, and the heating rate ( $\beta$ ) for NiGa<sub>2</sub>O<sub>x</sub> is 2, 5, 10, 20 K min<sup>-1</sup> and for CuGa<sub>2</sub>O<sub>4</sub> is 5, 10, 20 K min<sup>-1</sup>.

References:

- [Flynn 1966] J. H. Flynn and L. A. Wall, *J. Polym. Sci. B Polym. Phys.*, 1966, **4**, 323-328.  
[Ozawa 1965] T. Ozawa, *Bull. Chem. Soc. Jpn.*, 1965, **38**, 1881-1886.

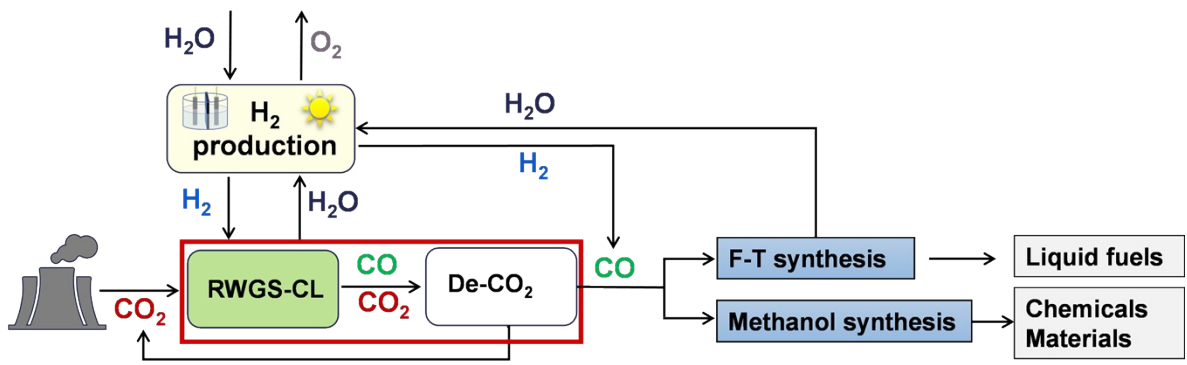

Fig. S1 The overall route of carbon-neutral and sustainable process with RWGS-CL.



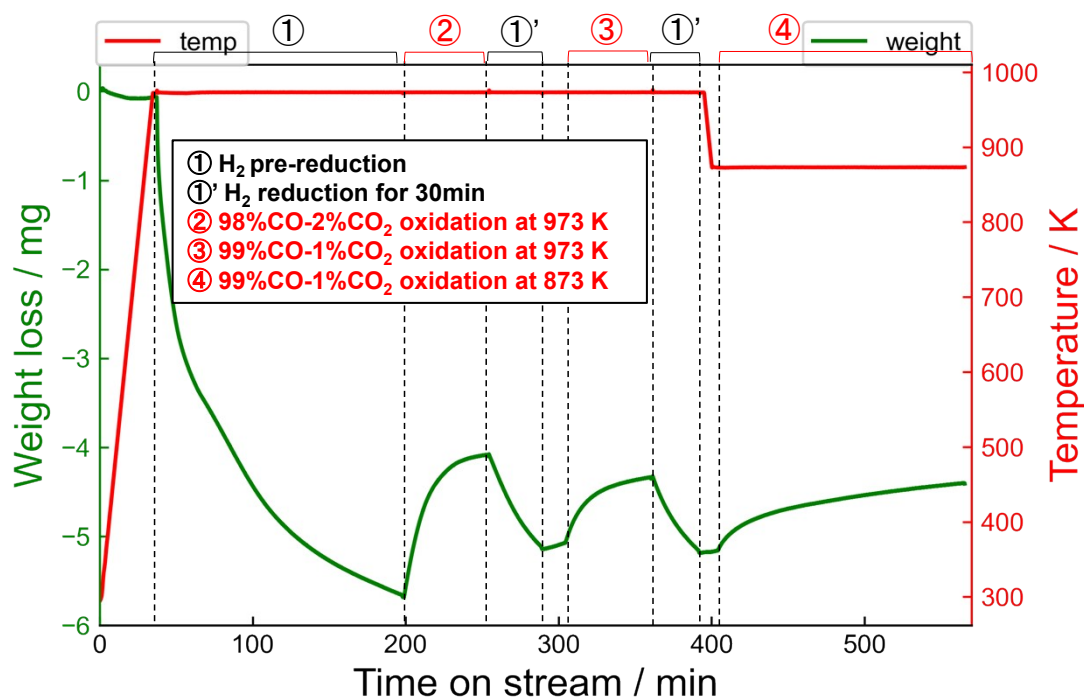

Fig. S2 The maximum CO<sub>2</sub> conversion evaluation of NiGa<sub>2</sub>O<sub>x</sub> at 873 and 973 K.

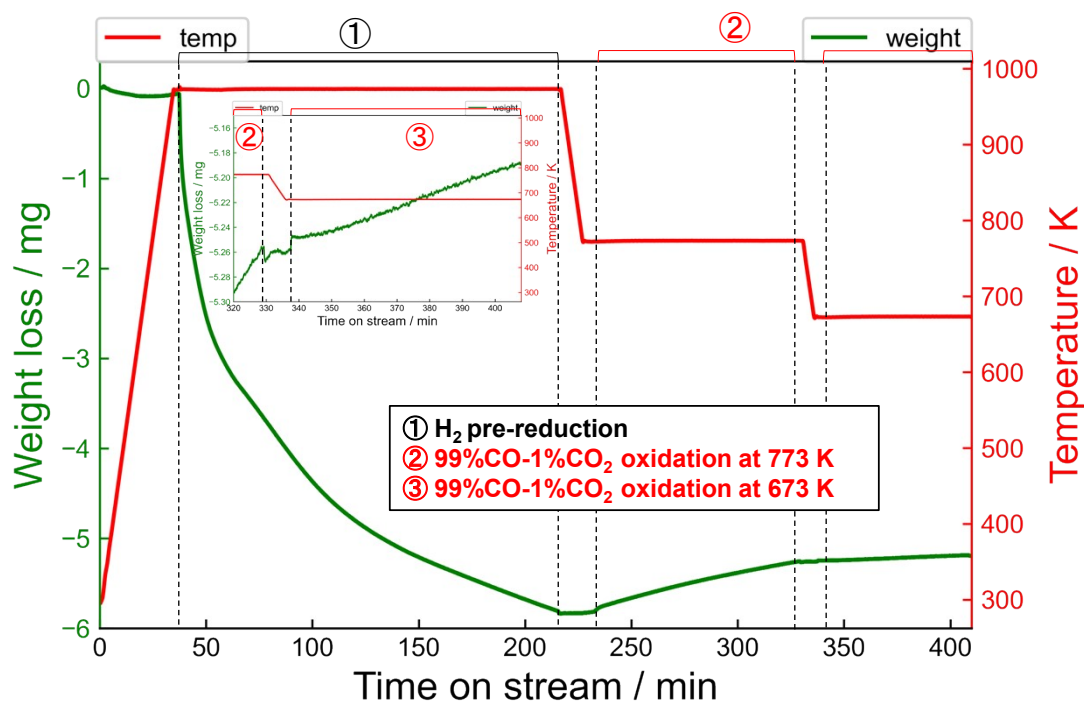

Fig. S3 The maximum CO<sub>2</sub> conversion evaluation of NiGa<sub>2</sub>O<sub>x</sub> at 673 and 773 K.

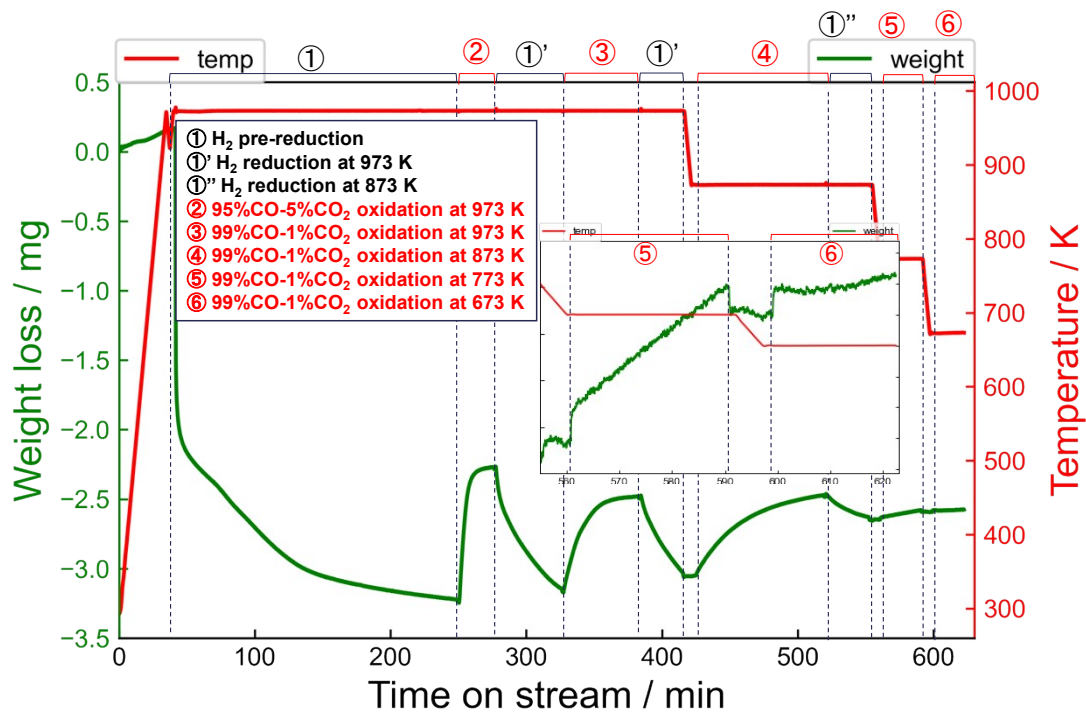

Fig. S4 The maximum CO<sub>2</sub> conversion evaluation of CuGa<sub>2</sub>O<sub>x</sub> at 673, 773, 873 and 973 K.

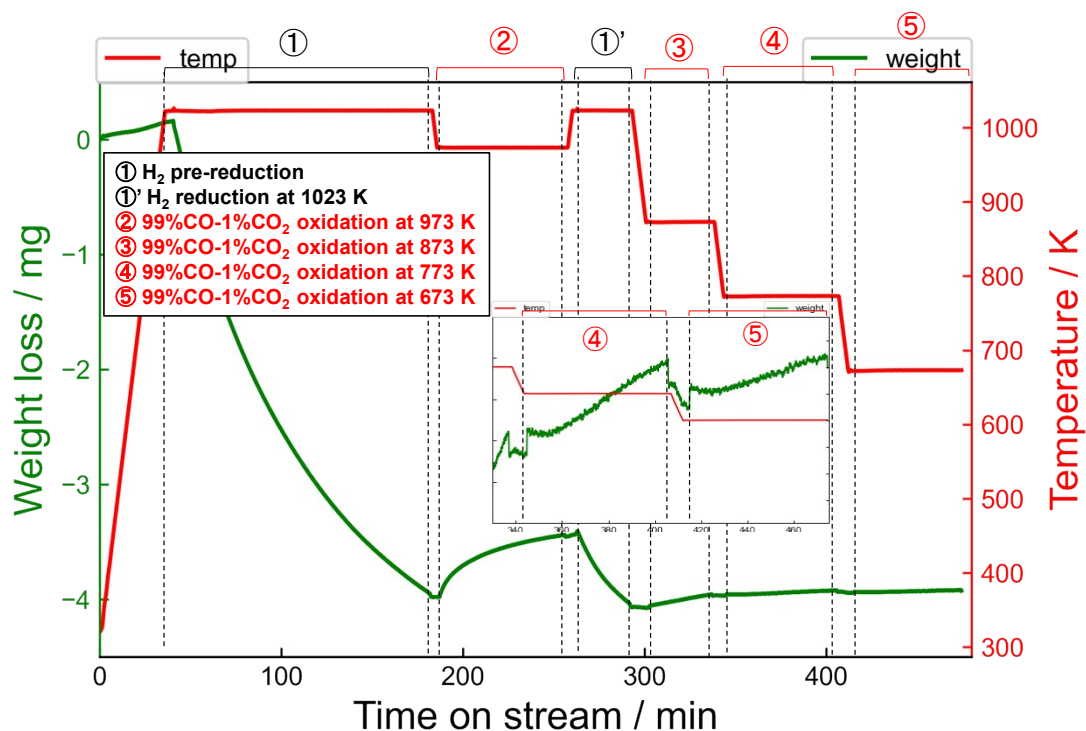

Fig. S5 The maximum CO<sub>2</sub> conversion evaluation of CoGa<sub>2</sub>O<sub>x</sub> at 673, 773, 873 and 973 K.

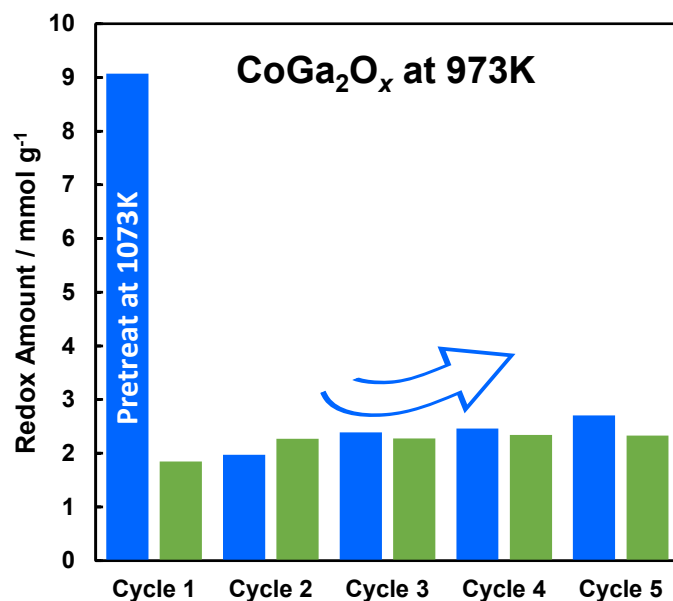

Fig. S6 The redox amounts of CoGa<sub>2</sub>O<sub>x</sub> with 90% CO-10% CO<sub>2</sub> as oxidation gas at 973K.

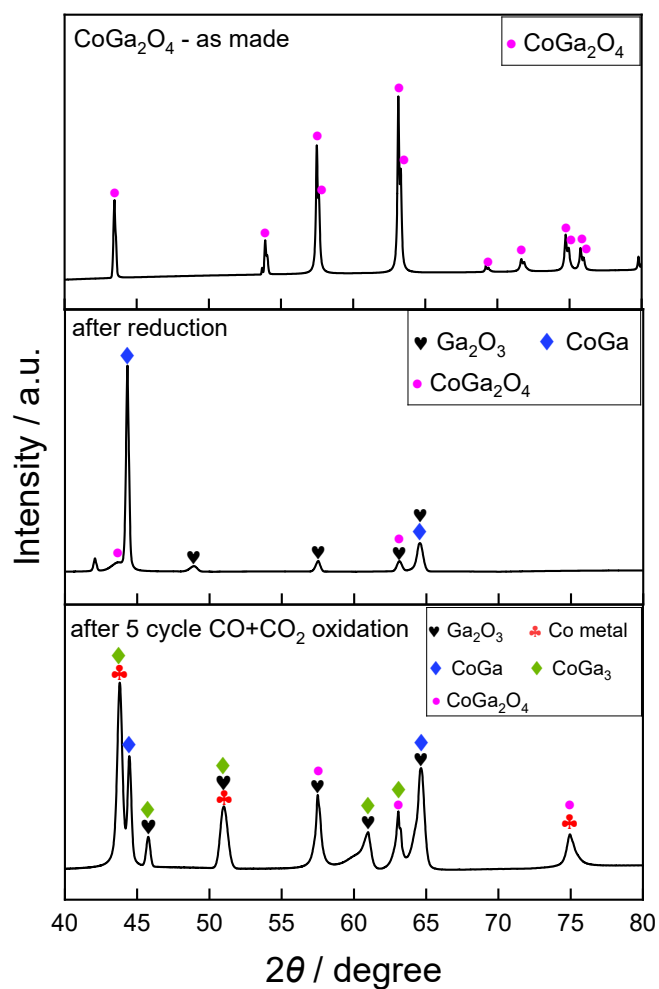

Fig. S7 The XRD profiles of CoGa<sub>2</sub>O<sub>x</sub> during RWGS-CL process.

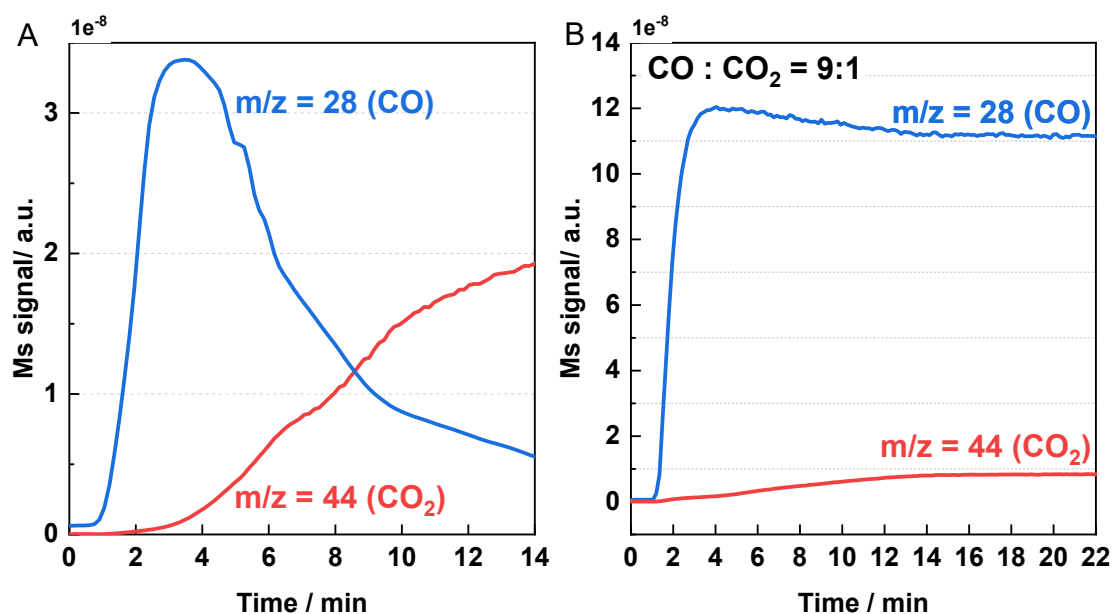

Fig. S8 MS spectra for the outlet gas of NiGa<sub>2</sub>O<sub>x</sub> during (A) CO<sub>2</sub> oxidation (B) CO+CO<sub>2</sub> oxidation at 973K.

To support the experimental results obtained by the thermogravimetric analyzer, we have conducted similar experiments using a fixed bed flow reactor equipped with a quadrupole mass spectrometer (Q-MS). Fig. S8 shows MS spectra for the outlet gas of NiGa<sub>2</sub>O<sub>x</sub> during both CO<sub>2</sub> oxidation and CO+CO<sub>2</sub> oxidation at 973K, it can be seen that CO is produced without any by-products during the re-oxidation by CO<sub>2</sub>. And we also checked carbon deposition after CO+CO<sub>2</sub> oxidation (check the amount of produced CO<sub>2</sub> with O<sub>2</sub> flowing through the sample after reaction), and the deposited carbon amount is 0.1%/g sample, which can be neglected and will not influence the result from thermogravimetric analyzer.

For the oxidation with CO<sub>2</sub> in Fig. S8A, in the first two minutes, there is no signal for CO<sub>2</sub> but a fast increase for CO, indicating high CO<sub>2</sub> conversion to CO of NiGa<sub>2</sub>O<sub>x</sub>. And for the oxidation with CO-CO<sub>2</sub> mixed gas with CO:CO<sub>2</sub> ratio of 9:1 in Fig. S8B, rapid increase of the signal of CO was observed immediately after the supply of CO-CO<sub>2</sub> gas, and then slowly decreases to a stable level. The peak for CO signal suggests that the forward reaction (CO production from CO<sub>2</sub>) proceeds under CO:CO<sub>2</sub> ratio of 9:1. And the stable parts indicates that the rate of the forward and reverse reactions were balanced. These results obtained using a fixed-bed reactor set-up can well support the results obtained by thermogravimetric analyzer. Therefore, we consider that the data

shown in this paper reflects the actual kinetics of  $\text{NiGa}_2\text{O}_x$ , and the data obtained by our reaction set-up is sufficiently reliable and reproducible based on no by-products and neglectable carbon deposition.

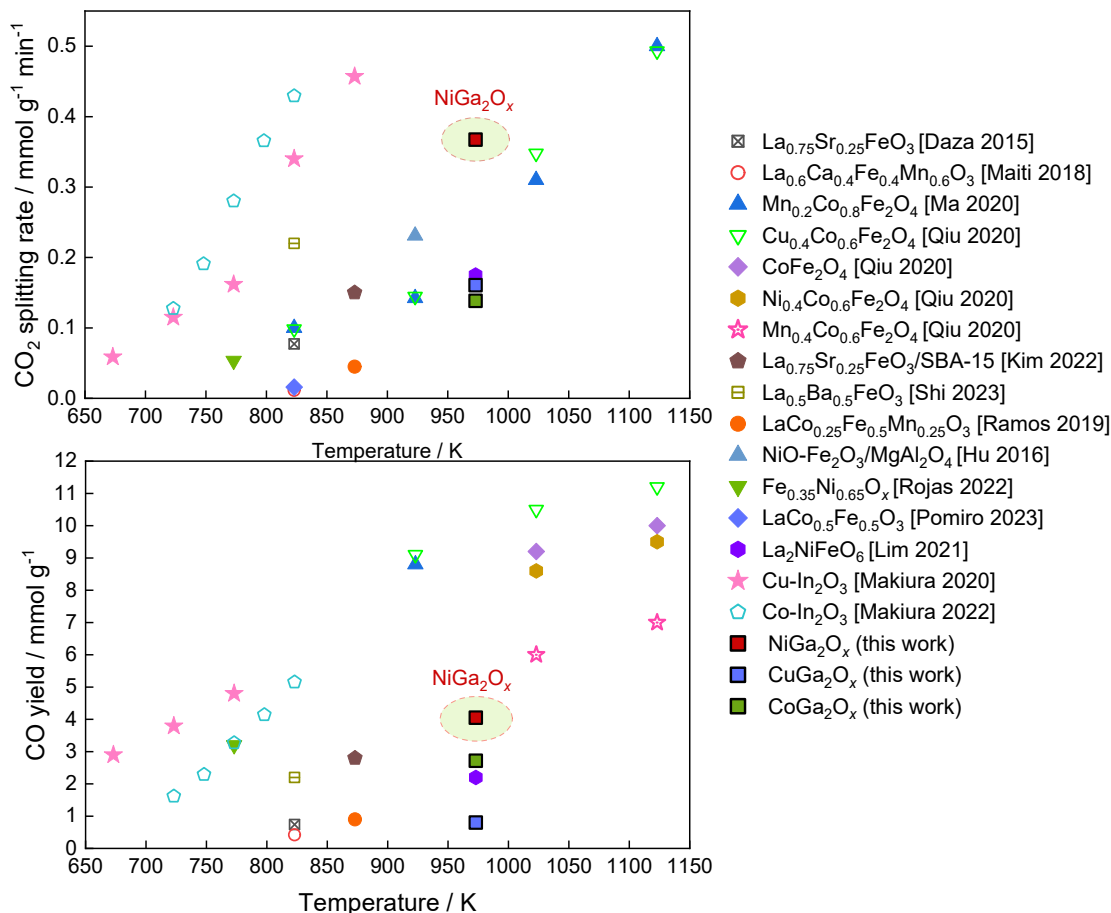

Fig. S9 Comparison of the CO<sub>2</sub> splitting rate and CO yield for RWGS-CL in present work and in the literatures.

#### References:

- [Daza 2015] Y. A. Daza, D. Maiti, R. A. Kent, V. R. Bhethanabotla and J. N. Kuhn, *Catal. Today*, 2015, **258**, 691-698
- [Maiti 2018] D. Maiti, B. J. Hare, Y. A. Daza, A. E. Ramos, J. N. Kuhn and V. R. Bhethanabotla, *Energy Environ. Sci.*, 2018, **11**, 648-659.
- [Ma 2020] L. Ma, Y. Qiu, M. Li, D. Cui, S. Zhang, D. Zeng and R. Xiao, *Ind. Eng. Chem. Res.*, 2020, **59**, 6924-6930.
- [Qiu 2020] Y. Qiu, L. Ma, D. Zeng, M. Li, D. Cui, Y. Lv, S. Zhang and R. Xiao, *J. Energy Chem.*, 2020, **46**, 123-132.
- [Kim 2022] Jo, Y. Kim, H. S. Lim, M. Lee, D. Kang and J. W. Lee, *J. CO<sub>2</sub> Util.*, 2022, **56**, 101845.
- [Shi 2023] H. Shi, V. R. Bhethanabotla and J. N. Kuhn, *J. Ind. Eng. Chem.*, 2023, **118**, 44-52.
- [Ramos 2019] E. Ramos, D. Maiti, Y. A. Daza, J. N. Kuhn and V. R. Bhethanabotla, *Catal. Today*, 2019, **338**, 52-59.
- [Hu 2016] J. W. Hu, L. Buelens, S. A. Theofanidis, V. Galvita, H. Poelman, G. B. Marin, *J. CO<sub>2</sub> Util.*, 2016, **16**, 8-16
- [Rojas 2022] J. Rojas, E. Sun, G. Wan, J. Oh, R. Randall, V. Haribal, I.-h. Jung, R. Gupta and A. Majumdar, *ACS Sustain. Chem. Eng.*, 2022, **10**, 12252-12261.
- [Pomiro 2023] F. J. Pomiro, G. G. Fougá, A. E. Bohé and G. De Micco, *J. Alloys Compd.*, 2023, **938**, 168671.
- [Lim 2021] H. S. Lim, Y. Kim, D. Kang, M. Lee, A. Jo and J. W. Lee, *ACS Catal.*, 2021, **11**, 12220-12231.
- [Makiura 2020] J. I. Makiura, T. Higo, Y. Kurosawa, K. Murakami, S. Ogo, H. Tsuneki, Y. Hashimoto, Y. Sato and Y. Sekine, *Chem. Sci.*, 2020, **12**, 2108-2113.
- [Makiura 2022] J. I. Makiura, S. Kakihara, T. Higo, N. Ito, Y. Hirano and Y. Sekine, *Chem. Commun.*, 2022, **58**, 4837-4840.

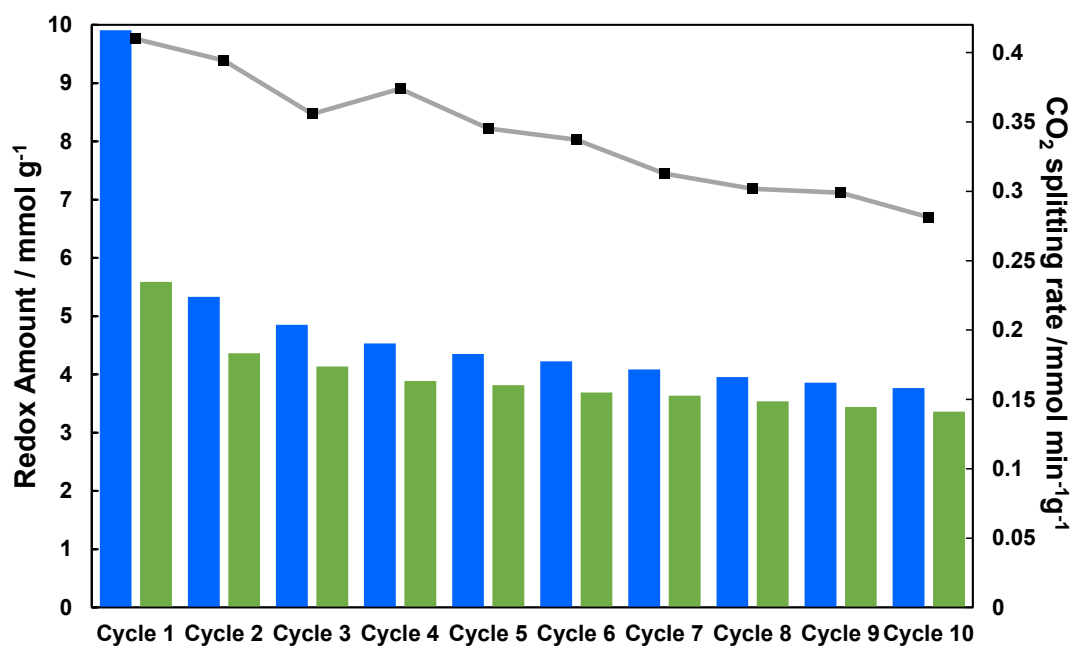

Fig. S10 Stability of NiGa<sub>2</sub>O<sub>x</sub> during 10 cycles at 973K.

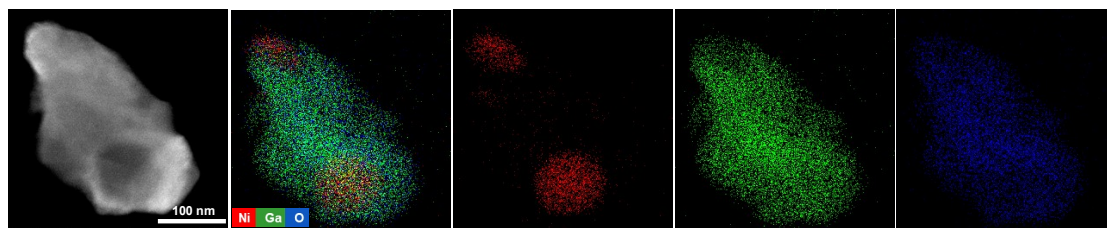

Fig. S11 STEM-EDX images of NiGa<sub>2</sub>O<sub>x</sub> after 10 cycle reaction.

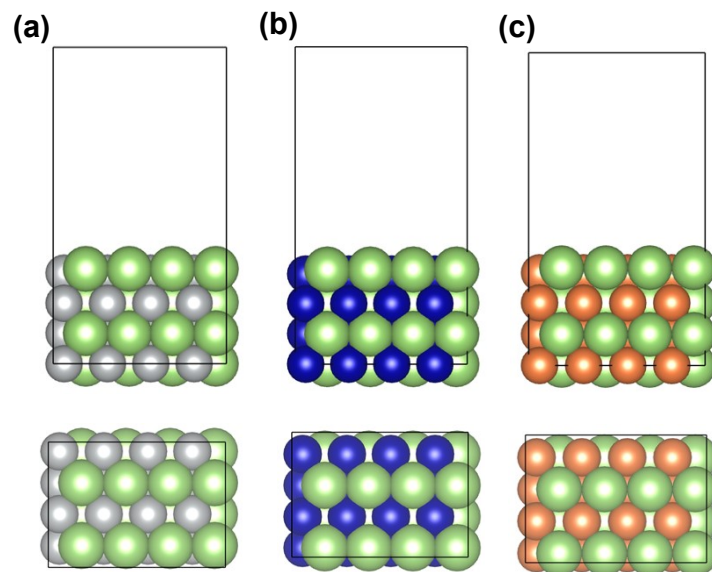

Fig. S12 Calculation model of (a) NiGa (110), (b) CoGa (110), and (c) CuGa (110). (Ga, Ni, Co, and Cu are illustrated as green, grey, blue, and orange.)

### CO<sub>2</sub> adsorption

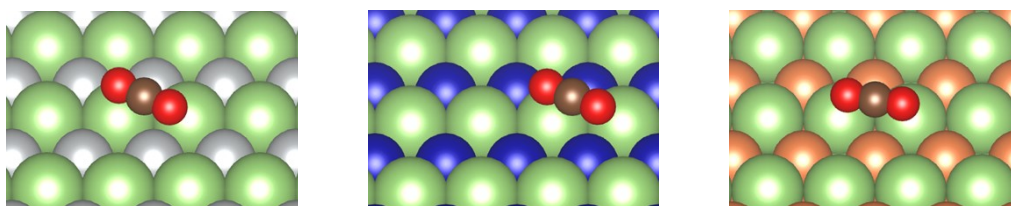

### C-O dissociation

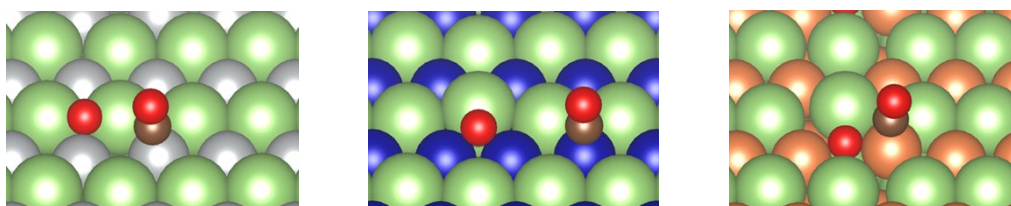

Fig. S13 Adsorption model on NiGa(110), CoGa(110), and CuGa(110). (Ga, Ni, Co, Cu, C, and O are illustrated as green, grey, blue, orange, brown, and red.)



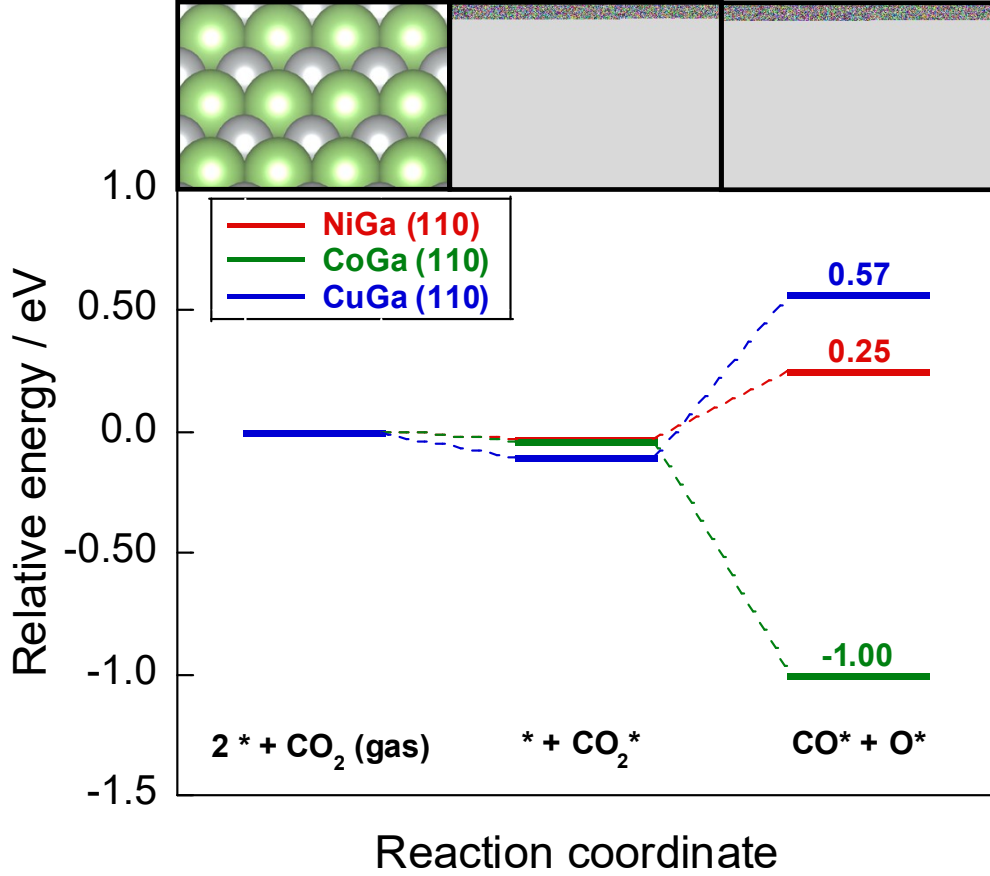

Fig. S14 Energy diagrams of CO<sub>2</sub> splitting on NiGa, CoGa, and CuGa surface.

To clarify the electronic structure of each alloy, NiGa, CoGa, and CuGa bulk systems were optimized by density functional theory (DFT) calculations, and the surface models of those alloys were prepared as a four-layer with a 4×4 expansion and 15 Å of vacuum layer as shown in Fig. S12. The bottom two layers were fixed during the geometry optimization. The Brillouin zone is sampled with a  $\Gamma$ -centered (56×56×56) and (3×4×2) Monkhorst-Pack  $k$ -point mesh for bulk model and slab model, respectively.

The adsorption energies were calculated by using the following equation.

$$\Delta E_{ad} = E(\text{surface with adsorbate}) - \{E(\text{surface}) + E(\text{CO}_2)\} \quad (1)$$

Where,  $E(\text{surface with adsorbate})$ ,  $E(\text{surface})$ , and  $E(\text{CO}_2)$  denote the total energy of alloy surface model with adsorbate, alloy surface without adsorbate, and CO<sub>2</sub> molecule, respectively. The isolated molecule of CO<sub>2</sub> was calculated in a 10 × 10 × 10 Å vacuum

cubic box, and Adsorption model on NiGa (110), CoGa (110), and CuGa (110) facet is shown in Fig. S13. All surface models were depicted by the visualization for electronic and structural analysis (VESTA) [Momma 2011]. Energy diagram on CO<sub>2</sub> splitting for each alloy in Fig. S14 and the adsorption energy in Table S2 show that NiGa (110) facet brings the most moderate C-O dissociation enthalpy among these three alloy facets, which is affected by CO adsorption ability on each alloy surface. Therefore, we found out that Ni-doping material brings better CO adsorption ability than the other two, and this nature might be the main reason Ni outperformed Cu and Co as the dopant.

#### References:

[Momma 2011] K. Momma and F. Izumi, *J. Appl. Crystallogr.*, **44** (2011) 1272–1276.

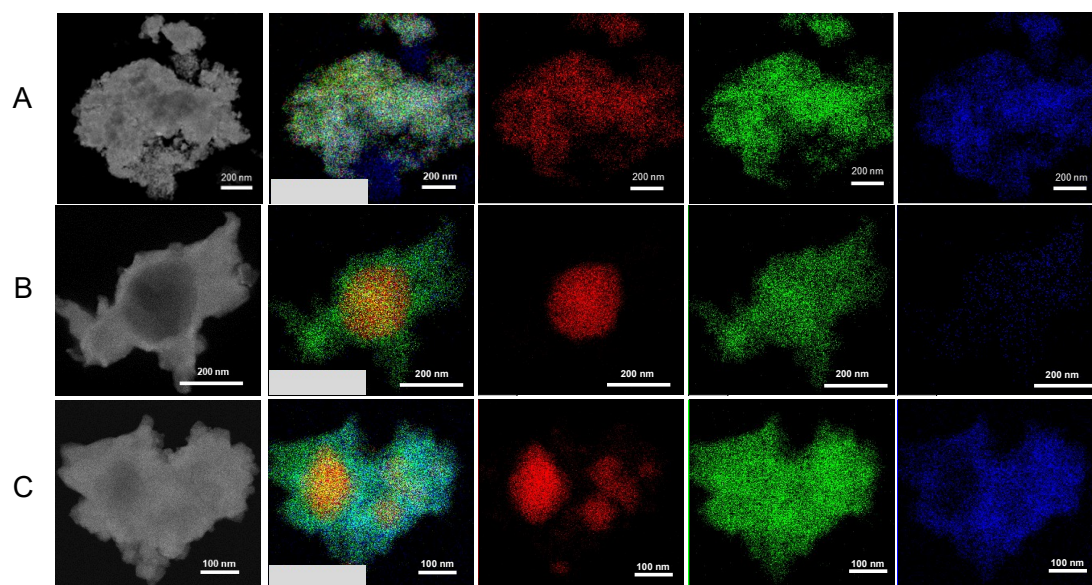

Fig. S15 STEM-EDX images of  $\text{NiGa}_2\text{O}_x$  (A) as-made (B) after reduction and (C) after  $\text{CO}+\text{CO}_2$  oxidation.

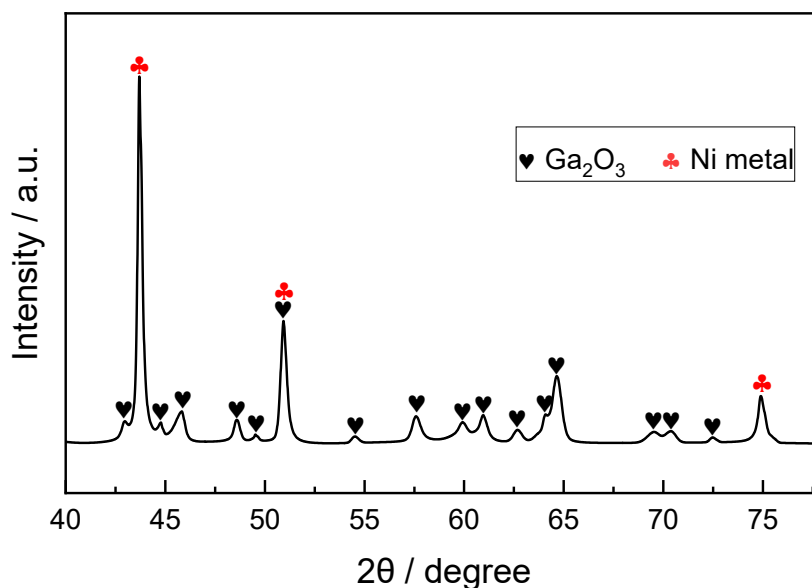

Fig. S16 The XRD profiles of  $\text{NiGa}_2\text{O}_x$  after  $\text{CO}_2$  oxidation.

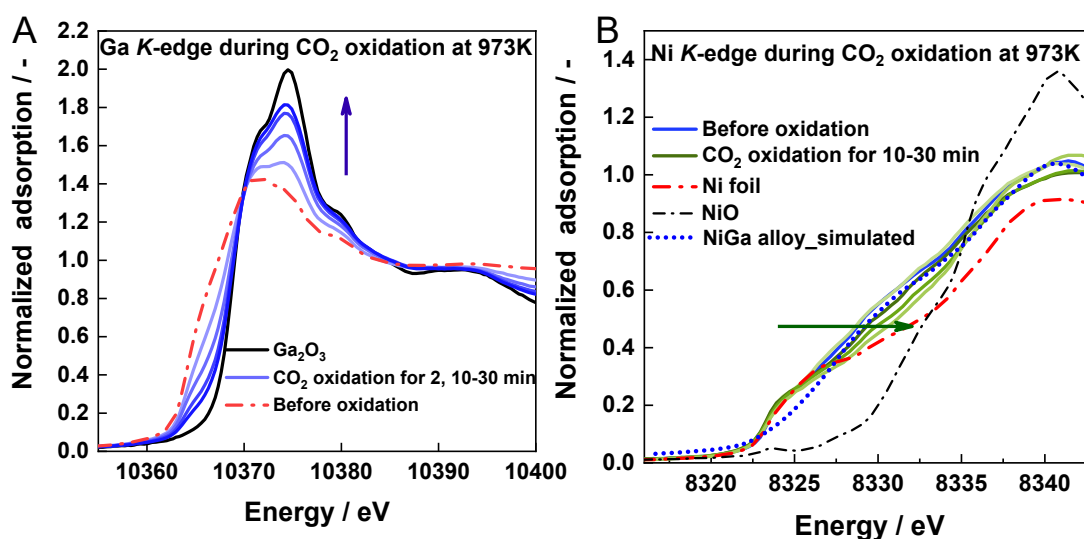

Fig. S17 *In situ* XANES spectra of  $\text{NiGa}_2\text{O}_x$  during  $\text{CO}_2$  oxidation on (A) Ga *K*-edge, and (B) Ni *K*-edge.

X-ray Absorption Near Edge Structure (XANES) of Ni *K*-edge was simulated to discuss the electronic states of Ni. The experimental and simulated spectra were summarized in Fig. 4C-D and Fig. S17B. A similar pre-edge shoulder peak at around 8330 eV, which can be assigned to *p-d* hybridization between Ga and Ni [Takayama 2021], shows up in the spectra of both the after-reduction sample and simulated NiGa alloy. This also manifests that the after-reduction sample shows similar electronic structure with NiGa alloy.

**References:**

[Takayama 2021] T. Takayama, R. Kariya, Y. Nakaya, S. Furukawa, S. Yamazoe, T. Komatsu, Chem. Commun., 2021,57, 4239-4242

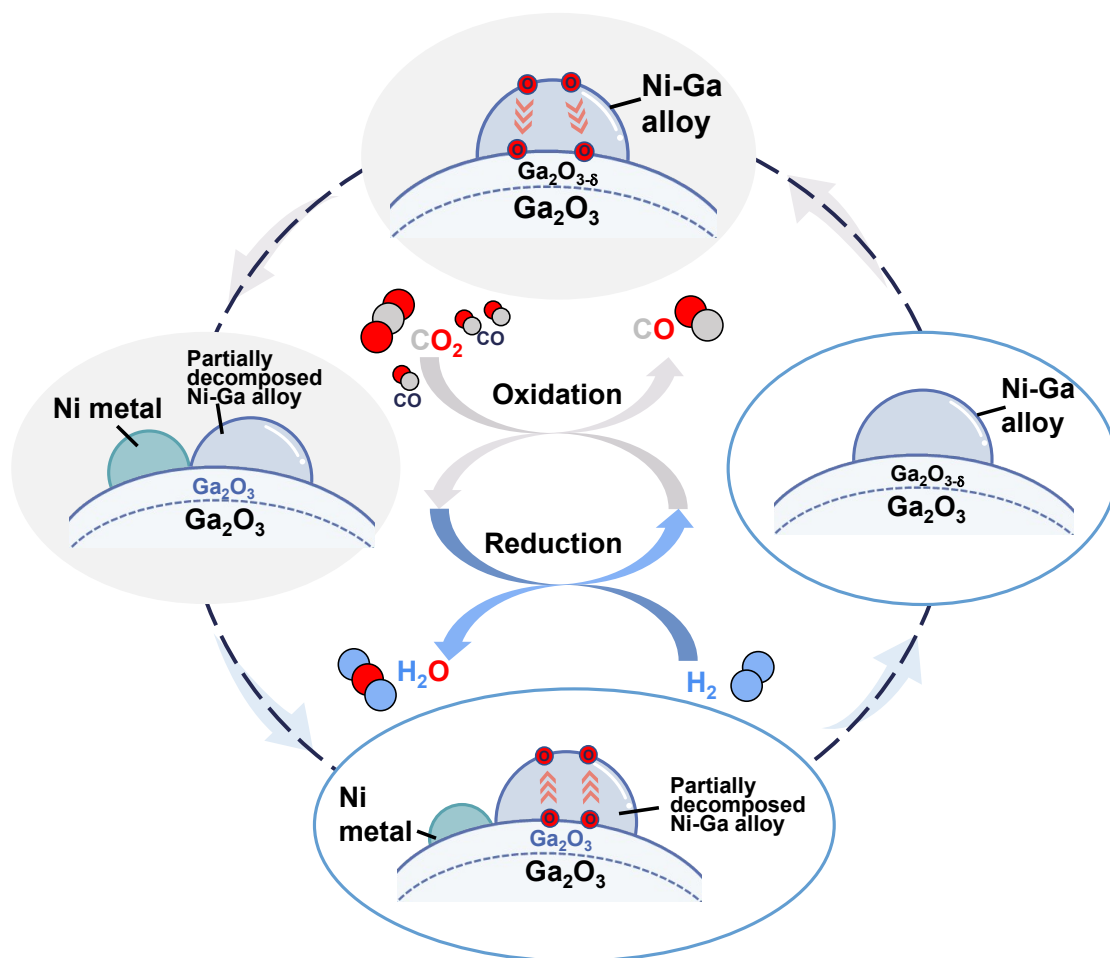

Fig. S18 Proposed redox mechanism of NiGa<sub>2</sub>O<sub>x</sub> during RWGS-CL process.

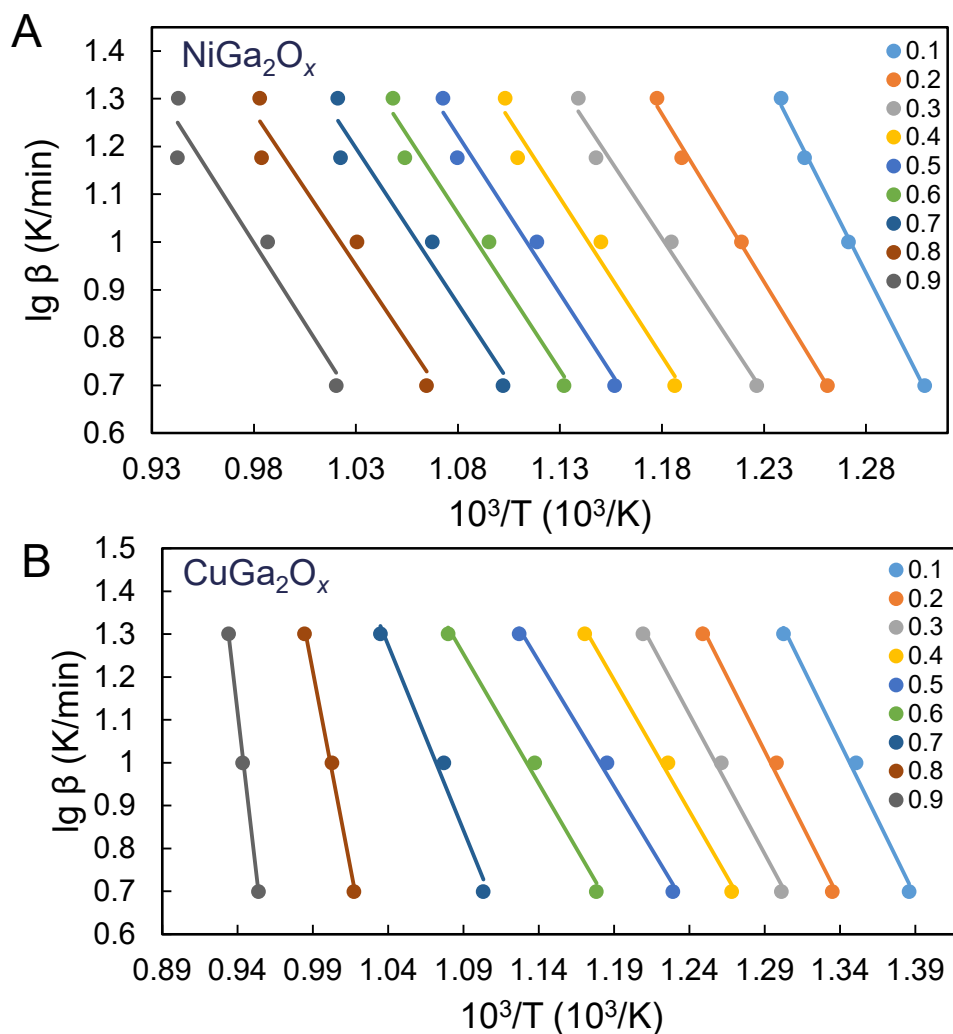

Fig. S19 Linear plot for determining  $\text{CO}_2$  oxidation activation energy calculated by FWO of (A)  $\text{NiGa}_2\text{O}_x$  (B)  $\text{CuGa}_2\text{O}_x$ .

Linear plot in Fig. S19 presents the change of  $\text{CO}_2$  oxidation conversion ( $\alpha$ ) with respect to temperature at different heating rates ( $\beta$ ), determining  $\text{CO}_2$  oxidation activation energy ( $E_a$ ) calculated by OFW of  $\text{NiGa}_2\text{O}_x$  and  $\text{CuGa}_2\text{O}_x$ . Based on this, the activation energy ( $E_a$ ) of  $\text{CO}_2$  oxidation as a function of conversion ( $\alpha$ ) was obtained and shown in Table S3. Generally, the activation energy of  $\text{CuGa}_2\text{O}_x$  dramatically increases as the conversion increases to higher than 0.6, while the activation energy of  $\text{NiGa}_2\text{O}_x$  keeps stable during the overall process. This illustrates that  $\text{NiGa}_2\text{O}_x$  can keep stable  $\text{CO}_2$  oxidation kinetics performance in a wider range than that of  $\text{CuGa}_2\text{O}_x$ .

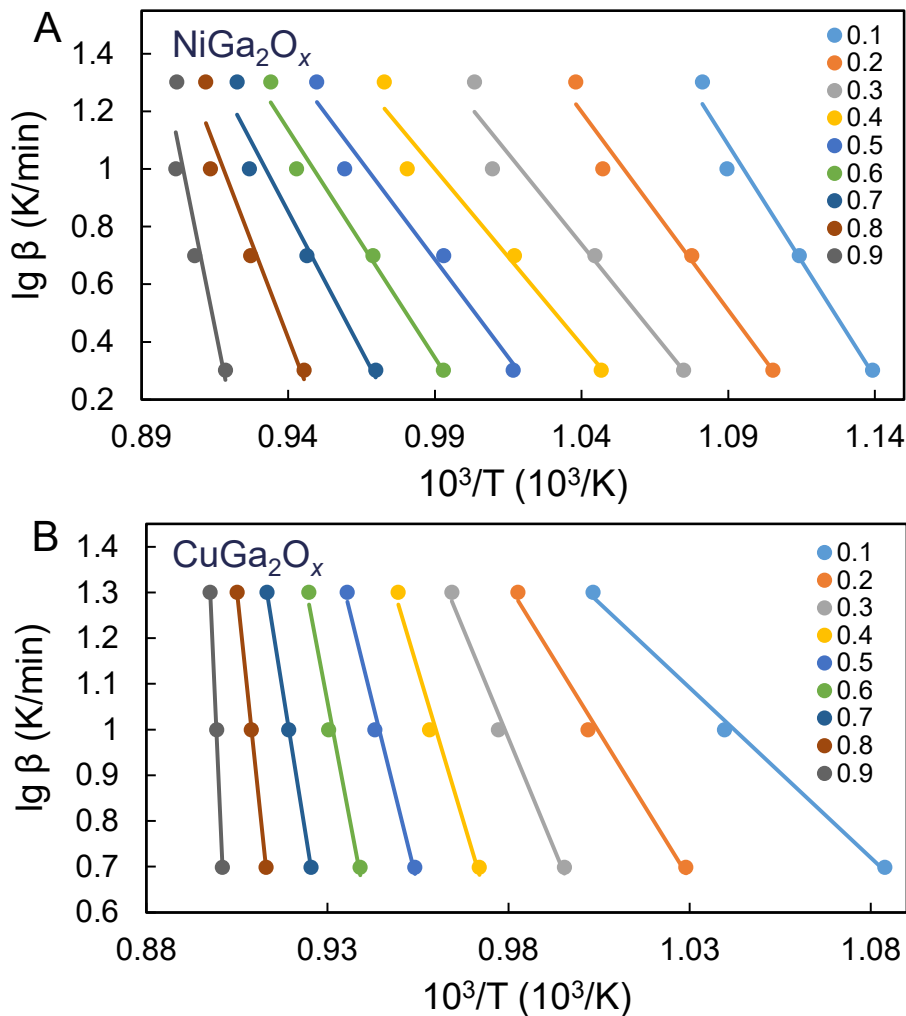

Fig. S20 Linear plot for determining CO reduction activation energy calculated by FWO of (A)  $\text{NiGa}_2\text{O}_x$  (B)  $\text{CuGa}_2\text{O}_x$ .

Linear plots for determining CO reduction activation energy calculated by OFW of  $\text{NiGa}_2\text{O}_x$  and  $\text{CuGa}_2\text{O}_x$  are shown in Fig. S20, and Table S4 presents the activation energy ( $E_a$ ) of CO reduction as a function of conversion ( $\alpha$ ). The activation energy of  $\text{CuGa}_2\text{O}_x$  is dramatic, manifesting that the performance of  $\text{CuGa}_2\text{O}_x$  is easily influenced by temperature. Regard to  $\text{NiGa}_2\text{O}_x$ , the activation energy slightly changes with conversion though, it is generally stable than that of  $\text{CuGa}_2\text{O}_x$ . In summary,  $\text{NiGa}_2\text{O}_x$  generally shows more stable activation energy with conversion changing than  $\text{CuGa}_2\text{O}_x$  for both the forward and backward proceeding of the oxidation step (equation 5), which makes  $\text{NiGa}_2\text{O}_x$  a more potential OSM with wider application temperature range even in the presence of high concentration CO than  $\text{CuGa}_2\text{O}_x$ .



Table S1 Surface area of  $\text{MGa}_2\text{O}_x$  (M = Ni, Cu, Co) in different reaction stages.

| Material                  | BET surface area at different reaction stages/ $\text{m}^2 \text{g}^{-1}$ |                 |                 |                     |
|---------------------------|---------------------------------------------------------------------------|-----------------|-----------------|---------------------|
|                           | as made                                                                   | after reduction | after oxidation | after 5th oxidation |
| $\text{NiGa}_2\text{O}_x$ | 27.3639                                                                   | 7.2308          | 7.3574          | 6.0315              |
| $\text{CoGa}_2\text{O}_x$ | 17.6798                                                                   | 3.5690          | 2.1840          | 1.6865              |
| $\text{CuGa}_2\text{O}_x$ | 2.0675                                                                    | 1.8669          | 0.6092          | 0.6804              |

Table S2 Adsorption energy on each adsorption site.

| Adsorbate                  | Catalyst | Adsorption site   | Adsorption energy / eV |
|----------------------------|----------|-------------------|------------------------|
| O adsorption               | NiGa     | hollow (Ni-Ga-Ga) | -1.76                  |
|                            |          | hollow (Ni-Ni-Ga) | -1.77                  |
|                            | CoGa     | hollow (Co-Ga-Ga) | -1.72                  |
|                            |          | hollow (Co-Co-Ga) | -2.23                  |
|                            | CuGa     | hollow (Cu-Ga-Ga) | -2.02                  |
|                            |          | hollow (Cu-Cu-Ga) | -2.15                  |
| CO adsorption              | NiGa     | on top (Ni)       | -1.08                  |
|                            |          | bridge (Ni-Ni)    | -0.90                  |
|                            | CoGa     | on top (Co)       | -1.99                  |
|                            |          | bridge (Co-Co)    | -1.71                  |
|                            | CuGa     | on top (Cu)       | -0.56                  |
|                            |          |                   |                        |
| CO <sub>2</sub> adsorption | NiGa     | physisorption     | -0.03                  |
|                            | CoGa     | physisorption     | -0.04                  |
|                            | CuGa     | physisorption     | -0.10                  |

Table S3 Activation energy ( $E_a$ ) of CO<sub>2</sub> oxidation as a function of conversion ( $\alpha$ ) over NiGa<sub>2</sub>O<sub>x</sub> and CuGa<sub>2</sub>O<sub>x</sub>.

| $\alpha$ | CuGa <sub>2</sub> O <sub>x</sub> |                | NiGa <sub>2</sub> O <sub>x</sub> |                |
|----------|----------------------------------|----------------|----------------------------------|----------------|
|          | $E_a$ (KJ mol <sup>-1</sup> )    | R <sup>2</sup> | $E_a$ (KJ mol <sup>-1</sup> )    | R <sup>2</sup> |
| 0.1      | 130.36                           | 0.992          | 153.49                           | 0.997          |
| 0.2      | 126.51                           | 0.993          | 127.66                           | 0.996          |
| 0.3      | 118.52                           | 0.994          | 118.17                           | 0.985          |
| 0.4      | 111.54                           | 0.994          | 120.78                           | 0.971          |
| 0.5      | 106.63                           | 0.993          | 120.70                           | 0.977          |
| 0.6      | 110.23                           | 0.991          | 119.53                           | 0.971          |
| 0.7      | 157.57                           | 0.982          | 118.79                           | 0.951          |
| 0.8      | 333.98                           | 0.995          | 116.62                           | 0.946          |
| 0.9      | /                                | /              | 122.59                           | 0.944          |

Table S4 Activation energy ( $E_a$ ) of CO reduction as a function of conversion ( $\alpha$ ) over NiGa<sub>2</sub>O<sub>x</sub> and CuGa<sub>2</sub>O<sub>x</sub>.

| $\alpha$ | CuGa <sub>2</sub> O <sub>x</sub> |                | NiGa <sub>2</sub> O <sub>x</sub> |                |
|----------|----------------------------------|----------------|----------------------------------|----------------|
|          | $E_a$ (KJ mol <sup>-1</sup> )    | R <sup>2</sup> | $E_a$ (KJ mol <sup>-1</sup> )    | R <sup>2</sup> |
| 0.1      | 135.60                           | 0.967          | 293.51                           | 0.974          |
| 0.2      | 234.20                           | 0.991          | 250.59                           | 0.971          |
| 0.3      | 349.11                           | 0.990          | 229.18                           | 0.953          |
| 0.4      | /                                | /              | 222.24                           | 0.959          |
| 0.5      | /                                | /              | 247.22                           | 0.966          |
| 0.6      | /                                | /              | 288.20                           | 0.975          |
